# Supplementary material
Source: PubMed Central journal article supplement (PMC11072459)
Supplement: 18_2022_4282_MOESM1_ESM.pdf [file 18_2022_4282_MOESM1_ESM.pdf]

## Supplementary data 1

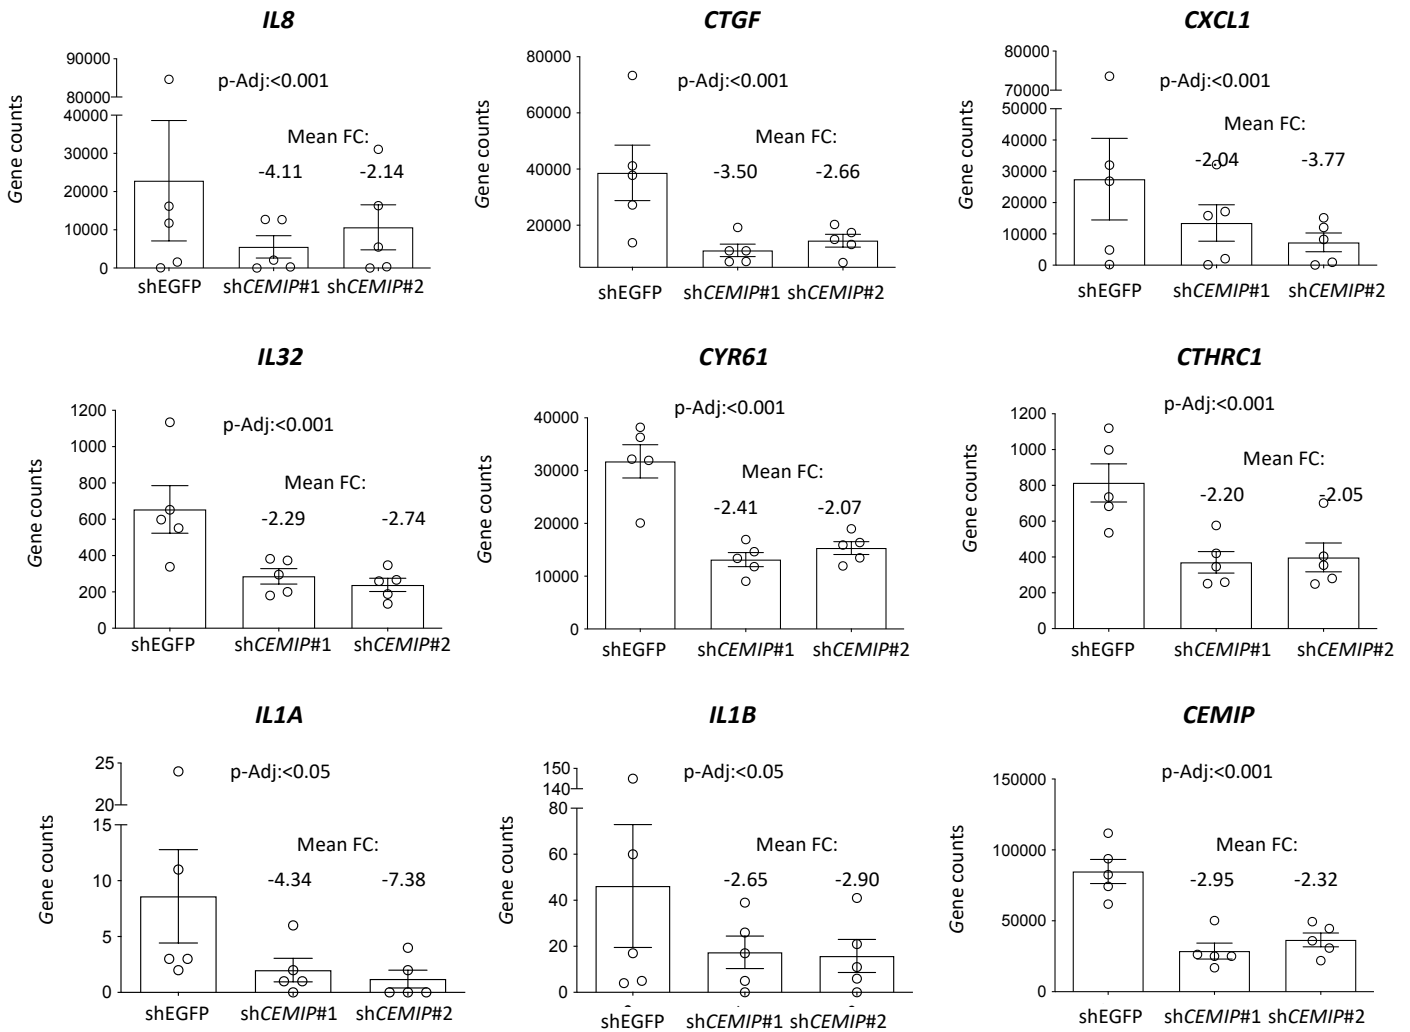

### CEMIP depletion decreased gene expressions belonging to inflammatory response and EMT pathways

Normalized gene counts of *IL8*, *CTGF*, *CXCL1*, *IL32*, *CYR61*, *CTHRC1*, *IL1A*, *IL1B* and *CEMIP* in CEMIP depleted cells (shCEMIP #1 and #2) compared to non-depleted cells (shEGFP). p-value adjusted (p-Adj) and Fold change (FC) between shCEMIP (#1 or #2) and shEGFP from differential expression analyses performed with DESeq2.

## Supplementary data 2

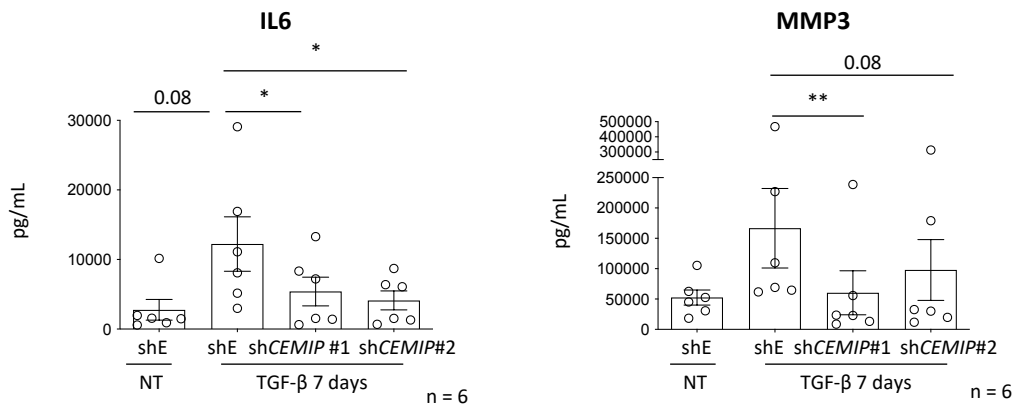

### **CEMIP regulates inflammation induced by TGF- $\beta$**

ELISA analysis of IL-6 (left) and MMP-3 (right) secretion in *CEMIP* depleted cells (sh*CEMIP* #1 and #2) stimulated with TGF- $\beta$  for 7 days compared to non-depleted cells (shEGFP) stimulated or not with TGF- $\beta$  for 7 days (n=6).

### Supplementary data 3

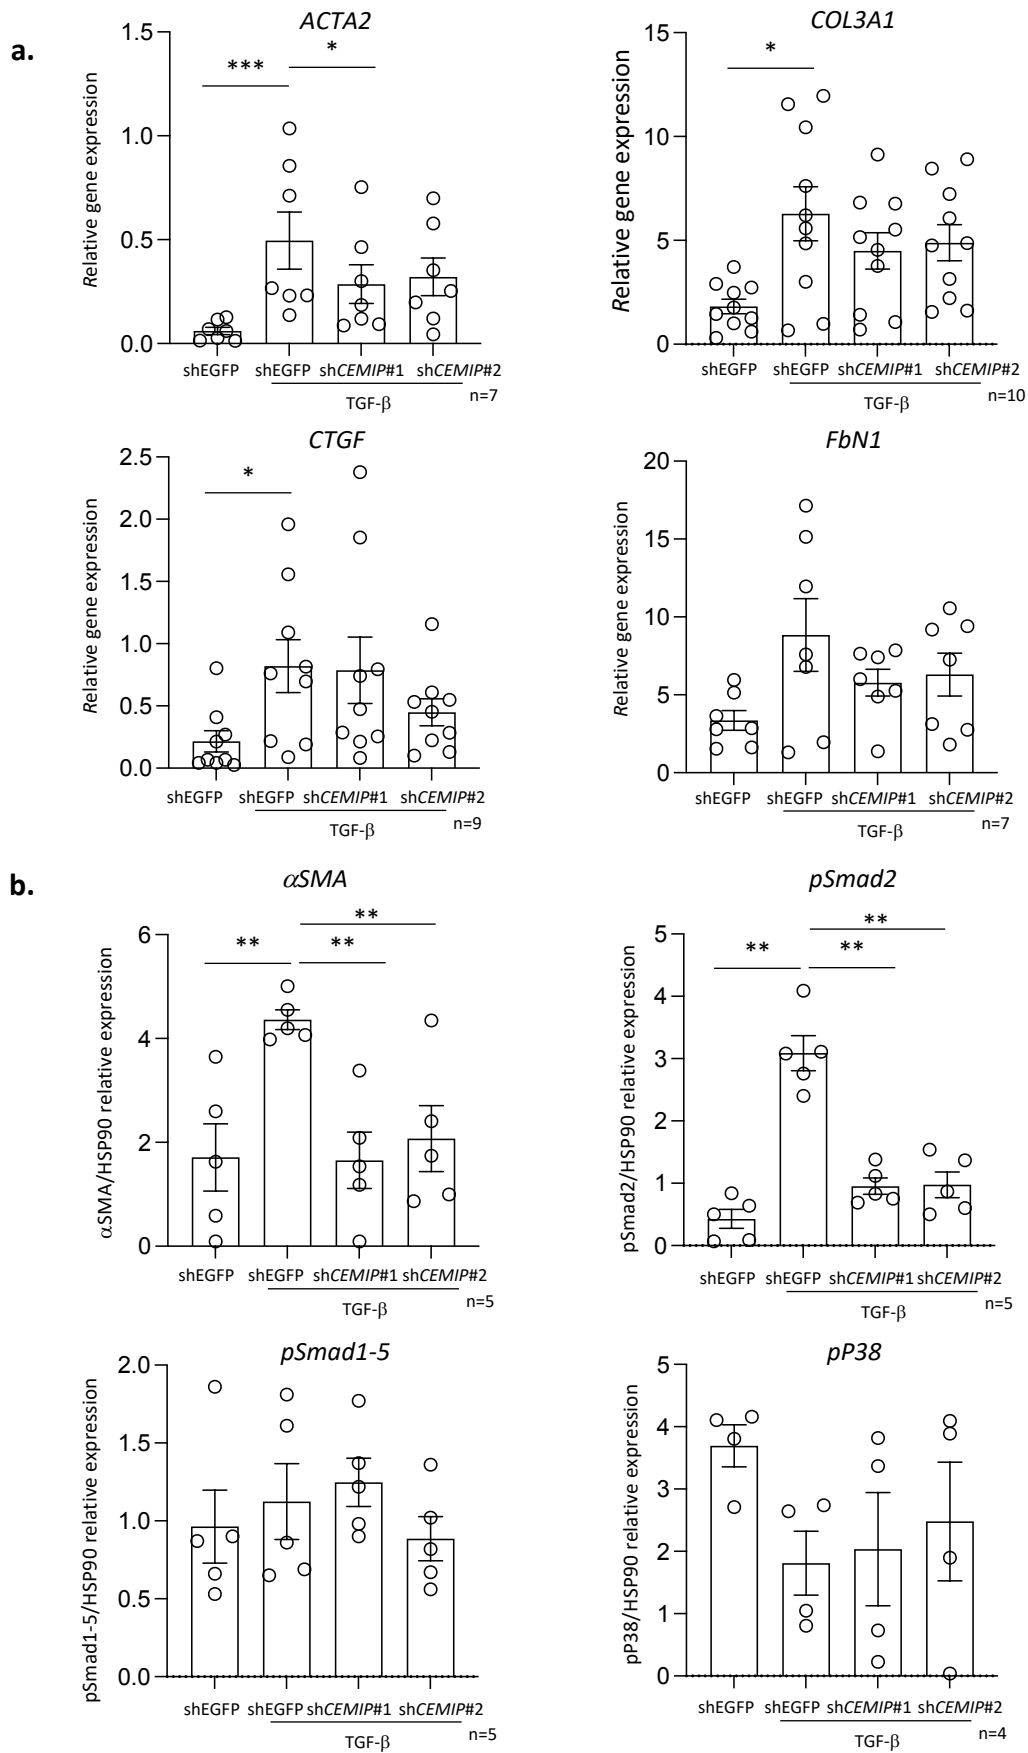

#### Regulation of fibrosis markers and TGF- $\beta$ signaling by Cemip after 1 day of TGF- $\beta$ treatment

RT-qPCR analysis of *ACTA2* (n=7), *COL3A1* (n=10), *CTGF* (n=9) and *FbN1* (n=7) genes in CEMIP-silenced FLS (shCEMIP#1 and shCEMIP#2) compared to non-silenced cells (shEGFP) treated or not with TGF- $\beta$  for 1 days (a). Western blot quantifications of  $\alpha$ SMA (n=5), pSmad2 (n=5), pSmad1/5 (n=5) and p-p38 (n=4) in CEMIP-silenced cells (shCEMIP#1 and shCEMIP#2) compared to non-silenced cells (shEGFP) treated or not with TGF- $\beta$  for 1 days.

## Supplementary Data 4

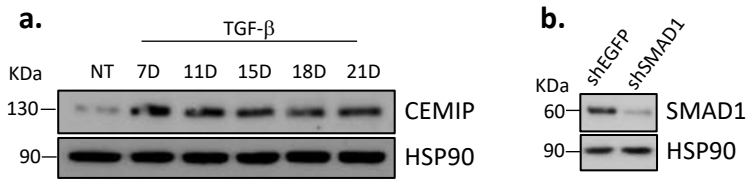

### **TGF- $\beta$ stimulation induces CEMIP expression**

Representative western blot analysis of CEMIP expression after TGF- $\beta$  stimulation during, 7, 11, 15, 18 and 21 days (a). Representative western blot analysis of SMAD1 expression after treatment with shEGFP and shSMAD1 (b).
